# Supplementary material for: Glycerophospholipids in Red Blood Cells Are Associated with Aerobic Performance in Young Swimmers
Source: MDPI journal article supplement (doi:10.3390/nu16060765), 2024-03-07
Supplement: s1 [file s1]

## Supplementary Files

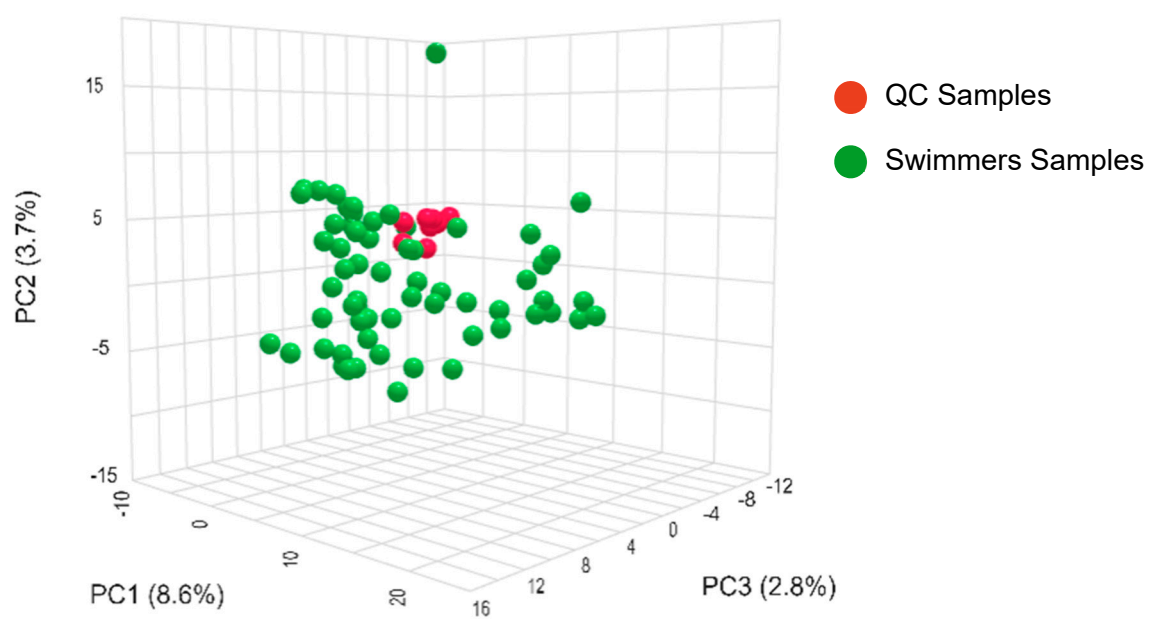

**Supplementary Figure S1.** Principal Component Analysis (PCA) results. PCA using all metabolites detected. The red point represents the QC Samples, and the green point represents Swimmers Samples.

# Glycerophospholipid metabolism

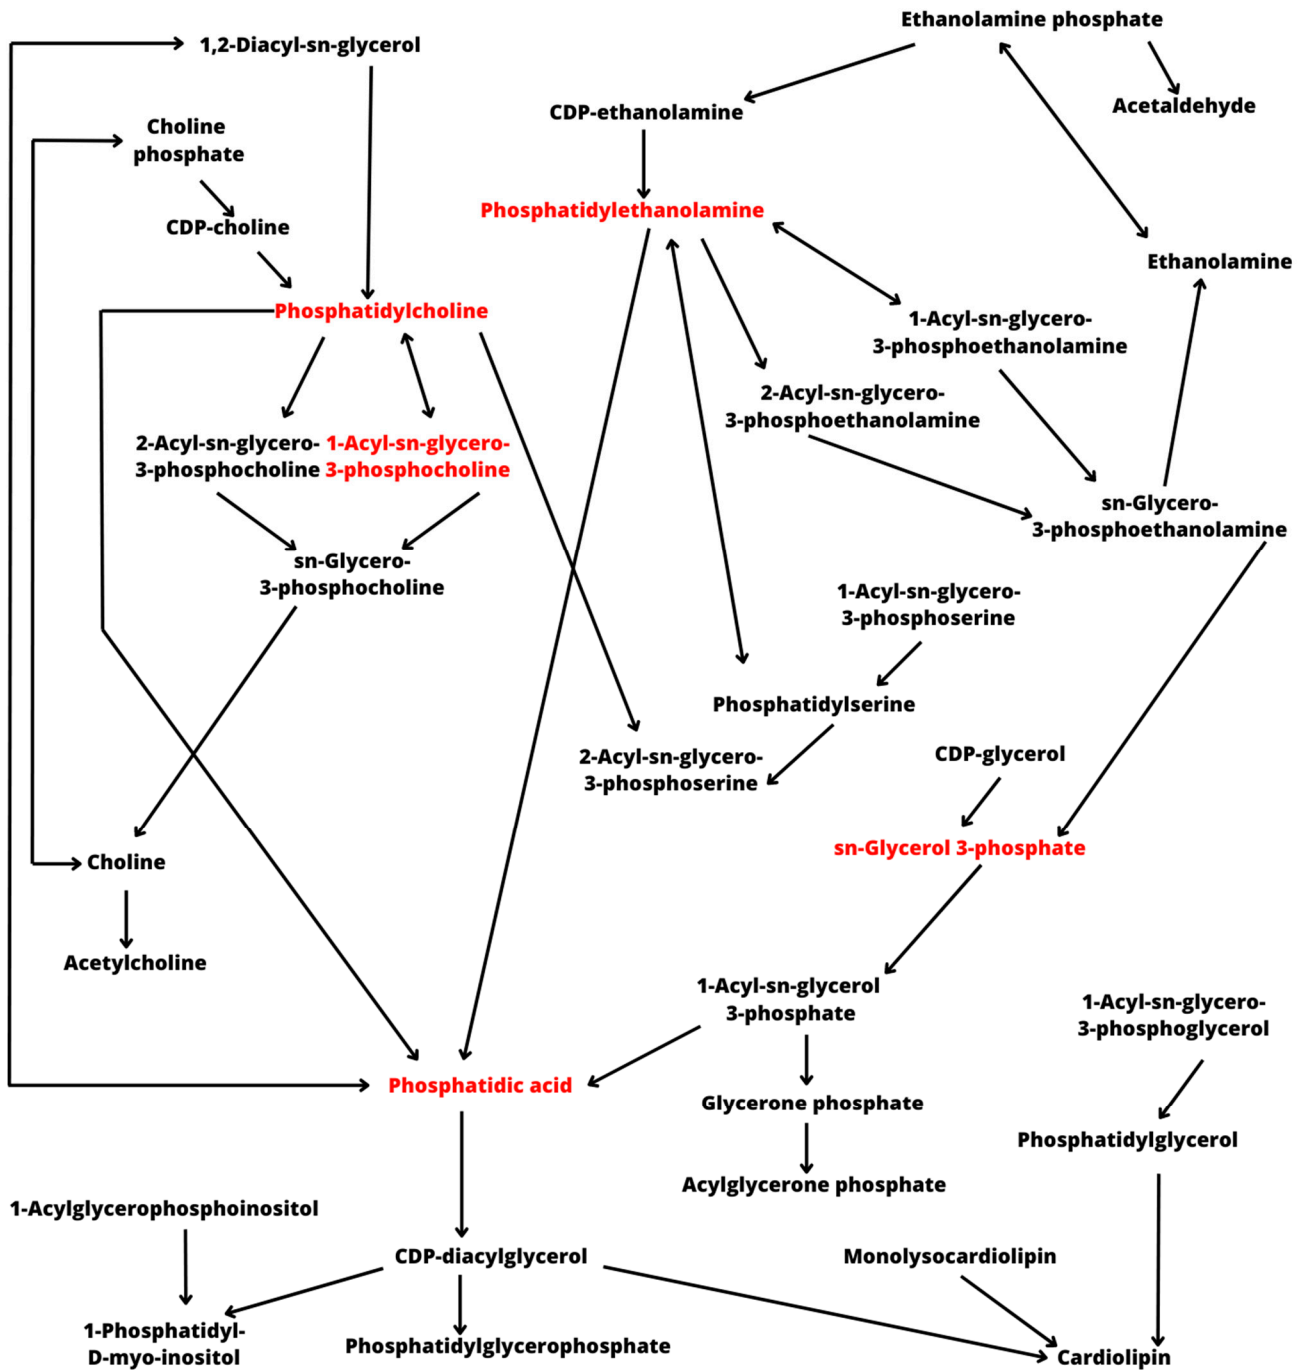

**Supplementary Figure S2.** The glycerophospholipid metabolism pathway and the lipids (i.e red) that were identified in erythrocytes of young swimmers.

**Supplementary Table S1.** Compounds identified (n=119) for red blood cell lipidomics.

| <i>m/z</i><br>measured | Retention<br>Time<br>(min) | Molecular<br>Formula                                          | Adduct               | Compound Name                                            | Mass<br>Error<br>(ppm) | Eigenvector | Main Class                       | SubClass                                     | Matched Fragments                                                                             |
|------------------------|----------------------------|---------------------------------------------------------------|----------------------|----------------------------------------------------------|------------------------|-------------|----------------------------------|----------------------------------------------|-----------------------------------------------------------------------------------------------|
| 217,0828               | 0,28                       | C <sub>7</sub> H <sub>12</sub> N <sub>2</sub> O <sub>3</sub>  | M+FA-H               | Glycylproline                                            | -1,39                  | 0,064770    | Carboxylic acids and derivatives | Amino acids, peptides, and analogues         | 188.0414; 170.0301; 157.0977; 128.0348;<br>114.0554; 87.0080                                  |
| 226,0728               | 0,28                       | C <sub>9</sub> H <sub>11</sub> NO <sub>3</sub>                | M+FA-H               | 4-HOPC4a                                                 | 3,84                   | 0,002794    | Pyridines and derivatives        | #N/D                                         | 135.0307; 107.0362; 85.0289<br>135.0306; 134.0220; 115.0395; 89.0237;<br>87.0080; 85.0290     |
| 147,0293               | 0,30                       | C <sub>5</sub> H <sub>8</sub> O <sub>5</sub>                  | M-H                  | Xylonolactone                                            | -4,88                  | 0,058714    | Lactones                         | Delta valerolactones                         | 134.0231; 129.0190; 113.0239; 101.0239;<br>89.0237; 87.0080                                   |
| 135,0306               | 0,31                       | C <sub>4</sub> H <sub>8</sub> O <sub>5</sub>                  | M-H                  | Erythronic acid                                          | 4,81                   | 0,055722    | Organooxygen compounds           | Carbohydrates and carbohydrate<br>conjugates | 135.0306; 117.0550; 115.0397; 103.0395;<br>89.0237; 87.0081                                   |
| 149,0453               | 0,31                       | C <sub>5</sub> H <sub>10</sub> O <sub>5</sub>                 | M-H                  | Xylose                                                   | -1,92                  | 0,002283    | Organooxygen compounds           | Carbohydrates and carbohydrate<br>conjugates | 103.0395; 99.0446; 89.0237; 83.0494; 81.0346;<br>71.0127                                      |
| 117,0552               | 0,33                       | C <sub>5</sub> H <sub>10</sub> O <sub>3</sub>                 | M-H                  | β-hydroxyvaleric acid                                    | -4,14                  | 0,003026    | Fatty Acyls                      | Fatty acids and conjugates                   | 144.0451; 135.0482; 115.0400; 108.0217;<br>97.0288; 92.0249                                   |
| 151,0395               | 0,33                       | C <sub>8</sub> H <sub>10</sub> O <sub>4</sub>                 | M-H <sub>2</sub> O-H | Furaneol acetate                                         | -3,52                  | 0,002740    | Dihydrofurans                    | Furanones                                    | 144.0451; 143.0713; 139.0401; 130.0635;<br>92.0249; 89.0237                                   |
| 157,0491               | 0,33                       | C <sub>7</sub> H <sub>10</sub> O <sub>4</sub>                 | M-H                  | xi-2,3-Dihydro-3,5-dihydroxy-6-<br>methyl-4H-pyran-4-one | -1,17                  | 0,000112    | Pyrans                           | Pyranones and derivatives                    | 157.0326; 154.0681; 123.0447; 115.0203;<br>108.0203; 103.0400                                 |
| 193,0496               | 0,33                       | C <sub>10</sub> H <sub>12</sub> O <sub>5</sub>                | M-H <sub>2</sub> O-H | Oresbusin A                                              | -4,82                  | 0,060215    | Phenols                          | Benzenediols                                 | 152.9953; 135.0307; 103.0395; 96.9691;<br>89.0237; 87.0081                                    |
| 217,0117               | 0,33                       | C <sub>3</sub> H <sub>9</sub> O <sub>6</sub> P                | M+FA-H               | Glycerol 3-phosphate                                     | -1,26                  | 0,003992    | Glycerophospholipids             | Glycerophosphates                            | 143.0714; 135.0307; 103.0394; 89.0237                                                         |
| 145,0866               | 0,35                       | C <sub>7</sub> H <sub>14</sub> O <sub>3</sub>                 | M-H                  | Methyl DL-Leucate                                        | -2,57                  | 0,000104    | Fatty Acyls                      | Fatty acid esters                            | 441.2524; 329.1893; 327.2321<br>281.2472; 279.2319; 255.2321; 173.0820;<br>129.0554; 109.0292 |
| 518,2878               | 0,54                       | C <sub>27</sub> H <sub>41</sub> N <sub>3</sub> O <sub>7</sub> | M-H                  | Vignatic acid B                                          | 1,26                   | 0,060259    | Carboxylic acids and derivatives | Amino acids, peptides, and analogues         | 297.2427; 295.2271; 279.2319; 253.2167;<br>214.0481; 184.0161                                 |
| 341,2323               | 0,59                       | C <sub>18</sub> H <sub>32</sub> O <sub>3</sub>                | M+FA-H               | FA 18:2;O                                                | -3,39                  | 0,052723    | Fatty Acyls                      | Fatty Acids and Conjugates                   | 303.2318; 214.0481                                                                            |
| 450,2621               | 0,59                       | C <sub>21</sub> H <sub>42</sub> NO <sub>7</sub> P             | M-H                  | LPE 16:1/0:0                                             | -1,12                  | 0,002725    | Glycerophospholipids             | Glycerophosphoethanolamines                  | 452.2776; 281.2476; 196.0637; 140.0113                                                        |
| 500,2773               | 0,59                       | C <sub>25</sub> H <sub>44</sub> NO <sub>7</sub> P             | M-H                  | LPE 20:4/0:0                                             | -1,94                  | 0,002348    | Glycerophospholipids             | Glycerophosphoethanolamines                  | 437.2676; 281.2476; 255.2320; 152.9952                                                        |
| 480,3082               | 0,75                       | C <sub>23</sub> H <sub>48</sub> NO <sub>7</sub> P             | M-H                  | LPE 18:0/0:0                                             | -2,74                  | 0,058921    | Glycerophospholipids             | Glycerophosphoethanolamines                  | 540.3305; 255.2320; 224.0685                                                                  |
| 481,2574               | 0,75                       | C <sub>21</sub> H <sub>41</sub> O <sub>7</sub> P              | M+FA-H               | LPA 18:1/0:0                                             | 0,58                   | 0,004145    | Glycerophospholipids             | Glycerophosphates                            | 478.2932; 196.0373<br>464.3136; 436.2824; 403.2606; 269.2476;<br>242.0795; 225.0742           |
| 540,3301               | 0,75                       | C <sub>24</sub> H <sub>50</sub> NO <sub>7</sub> P             | M+FA-H               | LPC 16:0/0:0                                             | -1,26                  | 0,063434    | Glycerophospholipids             | Glycerophosphocholines                       | 269.2477<br>436.2824; 283.2633; 269.2477; 242.0791;<br>224.0684                               |
| 506,3249               | 0,77                       | C <sub>25</sub> H <sub>50</sub> NO <sub>7</sub> P             | M-H                  | LPE 20:1                                                 | -0,53                  | 0,004318    | Glycerophospholipids             | Glycerophosphoethanolamines                  |                                                                                               |
| 524,3367               | 0,84                       | C <sub>24</sub> H <sub>50</sub> NO <sub>6</sub> P             | M+FA-H               | LPC O-16:1/0:0                                           | 1,93                   | 0,076892    | Glycerophospholipids             | Glycerophosphocholines                       |                                                                                               |
| 436,2825               | 0,89                       | C <sub>20</sub> H <sub>41</sub> NO <sub>4</sub> S             | M+FA-H               | N-Stearoyl Taurine                                       | -2,41                  | 0,004063    | Carboxylic acids and derivatives | Amino acids, peptides, and analogues         |                                                                                               |
| 466,3286               | 0,89                       | C <sub>24</sub> H <sub>43</sub> N <sub>5</sub> O <sub>3</sub> | M+FA-H               | N-Stearoyl Histidine                                     | -0,04                  | 0,079785    | Carboxylic acids and derivatives | Amino acids, peptides, and analogues         |                                                                                               |

|           |       |                                                                 |                      |                               |       |          |                            |                             |                                                            |
|-----------|-------|-----------------------------------------------------------------|----------------------|-------------------------------|-------|----------|----------------------------|-----------------------------|------------------------------------------------------------|
| 526,3514  | 0,89  | C <sub>24</sub> H <sub>52</sub> NO <sub>6</sub> P               | M+FA-H               | LPC O-16:0/0:0                | -0,02 | 0,085850 | Glycerophospholipids       | Glycerophosphocholines      | 494.3244; 452.2777; 269.2477; 342.0791                     |
| 599,3224  | 0,89  | C <sub>27</sub> H <sub>53</sub> O <sub>12</sub> P               | M-H                  | LPI 18:0/0:0                  | 3,68  | 0,000112 | Glycerophospholipids       | Glycerophosphoinositols     | 437.2676; 419.2558; 283.2633; 101.0238                     |
| 524,2991  | 0,91  | C <sub>24</sub> H <sub>48</sub> NO <sub>9</sub> P               | M-H                  | LPS 18:0                      | -0,58 | 0,000205 | Glycerophospholipids       | Glycerophosphoserines       | 437.2676; 419.2558; 152.9952                               |
| 492,3441  | 0,93  | C <sub>25</sub> H <sub>52</sub> NO <sub>6</sub> P               | M-H                  | LPE O-20:0                    | -3,82 | 0,055799 | Glycerophospholipids       | Glycerophosphoethanolamines | 462.2986; 436.2833; 140.0113                               |
| 466,2960  | 0,94  | C <sub>22</sub> H <sub>46</sub> NO <sub>7</sub> P               | M-H                  | LPC 14:0/0:0                  | 4,40  | 0,004391 | Glycerophospholipids       | Glycerophosphocholines      | 452.2776; 436.2823; 271.2276                               |
| 552,3096  | 0,96  | C <sub>29</sub> H <sub>48</sub> NO <sub>7</sub> P               | M-H                  | LPE 24:6                      | 0,04  | 0,000104 | Glycerophospholipids       | Glycerophosphoethanolamines | 535.3047; 152.9952; 122.0015                               |
| 506,3251  | 1,10  | C <sub>25</sub> H <sub>50</sub> NO <sub>7</sub> P               | M-H                  | LPE 20:1                      | -0,19 | 0,058793 | Glycerophospholipids       | Glycerophosphoethanolamines | 464.3137                                                   |
| 568,3617  | 1,10  | C <sub>26</sub> H <sub>54</sub> NO <sub>7</sub> P               | M+FA-H               | LPC 18:0/0:0                  | -0,64 | 0,000109 | Glycerophospholipids       | Glycerophosphocholines      | 508.3401; 283.2632; 224.0687                               |
| 480,3088  | 1,16  | C <sub>23</sub> H <sub>48</sub> NO <sub>7</sub> P               | M-H                  | LPE 18:0/0:0                  | -1,56 | 0,003046 | Glycerophospholipids       | Glycerophosphoethanolamines | 465.3179; 446.3041; 309.2797; 196.0374                     |
| 872,5237  | 1,37  | C <sub>50</sub> H <sub>78</sub> NO <sub>8</sub> P               | M+Na-2H              | PE-NMe(44:11)                 | 3,02  | 0,002887 | Glycerophospholipids       | Glycerophosphoethanolamines | 856.5167; 854.5194; 808.4825; 169.0473                     |
| 817,6420  | 10,81 | C <sub>44</sub> H <sub>89</sub> N <sub>2</sub> O <sub>6</sub> P | M+FA-H               | SM 39:1;O <sub>2</sub>        | -2,62 | 0,003444 | Sphingolipids              | Phosphosphingolipids        | 757.6235                                                   |
| 778,5774  | 11,53 | C <sub>45</sub> H <sub>84</sub> NO <sub>8</sub> P               | M-H <sub>2</sub> O-H | PE 22:2/18:1                  | 2,27  | 0,002040 | Glycerophospholipids       | Glycerophosphoethanolamines | 281.2477; 140.0110                                         |
| 728,5607  | 11,59 | C <sub>41</sub> H <sub>80</sub> NO <sub>7</sub> P               | M-H                  | PE P-18:1/18:0                | 0,98  | 0,004226 | Glycerophospholipids       | Glycerophosphoethanolamines | 464.3143; 446.3037; 281.2476; 140.0113                     |
| 664,5891  | 12,04 | C <sub>40</sub> H <sub>77</sub> NO <sub>3</sub>                 | M+FA-H               | Cer 40:2;O <sub>2</sub>       | 0,84  | 0,077881 | Sphingolipids              | Ceramides                   | 618.5838                                                   |
| 874,6683  | 12,14 | C <sub>52</sub> H <sub>96</sub> NO <sub>8</sub> P               | M-H <sub>2</sub> O-H | PE-NMe 46:4                   | -1,34 | 0,000117 | Glycerophospholipids       | Glycerophosphoethanolamines | 857.6767; 168.0424                                         |
| 690,6046  | 12,43 | C <sub>42</sub> H <sub>79</sub> NO <sub>3</sub>                 | M+FA-H               | Cer 42:3;O <sub>2</sub>       | 0,67  | 0,072929 | Sphingolipids              | Ceramides                   | 644.5989; 614.5878; 388.3576; 363.3286; 362.3428           |
| 664,5890  | 12,57 | C <sub>40</sub> H <sub>77</sub> NO <sub>3</sub>                 | M+FA-H               | Cer 18:1;O <sub>2</sub> /22:1 | 0,65  | 0,069419 | Sphingolipids              | Ceramides                   | 620.5908; 618.5837; 588.5732; 339.3293; 321.3130           |
| 716,6206  | 12,72 | C <sub>44</sub> H <sub>81</sub> NO <sub>3</sub>                 | M+FA-H               | Cer 44:4;O <sub>2</sub>       | 1,17  | 0,074668 | Sphingolipids              | Ceramides                   | 670.6161                                                   |
| 678,6047  | 13,26 | C <sub>41</sub> H <sub>79</sub> NO <sub>3</sub>                 | M+FA-H               | Cer 41:2;O <sub>2</sub>       | 0,85  | 0,088324 | Sphingolipids              | Ceramides                   | 632.5991                                                   |
| 695,5971  | 13,26 | C <sub>46</sub> H <sub>80</sub> O <sub>4</sub>                  | M-H                  | FAHFA 46:5                    | -1,91 | 0,088345 | Fatty Acyls                | Fatty acids and conjugates  | 331.2635                                                   |
| 710,6306  | 13,26 | C <sub>42</sub> H <sub>83</sub> NO <sub>4</sub>                 | M+FA-H               | Cer 42:1;O <sub>2</sub>       | 0,30  | 0,000304 | Sphingolipids              | Ceramides                   | 664.6260; 646.6148; 632.5991                               |
| 684,6144  | 13,33 | C <sub>40</sub> H <sub>81</sub> NO <sub>4</sub>                 | M+FA-H               | Cer 40:0;O <sub>2</sub>       | -0,52 | 0,005597 | Sphingolipids              | Ceramides                   | 638.6093                                                   |
| 1221,8239 | 13,54 | C <sub>30</sub> H <sub>62</sub> NO <sub>9</sub> P               | 2M-H                 | LPS O-24:0/O                  | -1,02 | 0,068636 | Glycerophospholipids       | Glycerophosphoserines       | 1175.8191; 1134.7914                                       |
| 728,6415  | 13,54 | C <sub>42</sub> H <sub>85</sub> NO <sub>5</sub>                 | M+FA-H               | Cer 42:0;O <sub>3</sub>       | 0,78  | 0,000197 | Sphingolipids              | Ceramides                   | 682.6255                                                   |
| 662,6100  | 13,60 | C <sub>42</sub> H <sub>81</sub> NO <sub>4</sub>                 | M-H                  | HexCer 36:1;O                 | 1,07  | 0,068406 | Neutral glycosphingolipids | Simple Glc series           | 646.6144; 406.3690; 390.3729; 364.3577; 347.3312; 263.2374 |
| 692,6202  | 13,60 | C <sub>42</sub> H <sub>81</sub> NO <sub>3</sub>                 | M+FA-H               | Cer 18:1;O <sub>2</sub> /24:1 | 0,52  | 0,083209 | Sphingolipids              | Ceramides                   | 646.6144; 616.6036; 406.3681; 390.3729; 364.3577           |
| 709,6114  | 13,60 | C <sub>47</sub> H <sub>84</sub> O <sub>5</sub>                  | M-H <sub>2</sub> O-H | DG 24:0/20:4                  | -3,58 | 0,074106 | Glycerolipids              | Diradylglycerols            | 692.6202; 347.3312                                         |

|           |       |                                                                 |                      |                                 |       |          |                            |                                       |                                                                                                         |
|-----------|-------|-----------------------------------------------------------------|----------------------|---------------------------------|-------|----------|----------------------------|---------------------------------------|---------------------------------------------------------------------------------------------------------|
| 666,6042  | 13,65 | C <sub>40</sub> H <sub>79</sub> NO <sub>3</sub>                 | M+FA-H               | Cer 40:1;O <sub>2</sub>         | 0,03  | 0,055969 | Sphingolipids              | Ceramides                             | 620.5988                                                                                                |
| 799,6708  | 13,67 | C <sub>46</sub> H <sub>93</sub> N <sub>2</sub> O <sub>6</sub> P | M-H                  | SM 17:1;O <sub>2</sub> /24:0    | 1,16  | 0,004501 | Sphingolipids              | Phosphosphingolipids                  | 366.3736; 349.3468                                                                                      |
| 859,6918  | 13,67 | C <sub>47</sub> H <sub>95</sub> N <sub>2</sub> O <sub>6</sub> P | M+FA-H               | SM 18:1;O <sub>2</sub> /24:0    | 0,97  | 0,000235 | Sphingolipids              | Phosphosphingolipids                  | 1674.3823; 859.6921; 799.6707; 366.3736                                                                 |
| 876,6832  | 13,67 | C <sub>52</sub> H <sub>98</sub> NO <sub>8</sub> P               | M-H <sub>2</sub> O-H | PE-NMe 24:1/22:2                | -2,24 | 0,002098 | Glycerophospholipids       | Glycerophosphoethanolamines           | 859.6921; 168.0423                                                                                      |
| 706,6366  | 13,77 | C <sub>43</sub> H <sub>83</sub> NO <sub>3</sub>                 | M+FA-H               | Cer 43:2;O <sub>2</sub>         | 1,61  | 0,055778 | Sphingolipids              | Ceramides                             | 660.6300                                                                                                |
| 738,6622  | 13,87 | C <sub>44</sub> H <sub>87</sub> NO <sub>4</sub>                 | M+FA-H               | Cer 44:1;O <sub>2</sub>         | 0,66  | 0,004887 | Sphingolipids              | Ceramides                             | 692.6863                                                                                                |
| 862,7125  | 13,88 | C <sub>50</sub> H <sub>99</sub> NO <sub>8</sub>                 | M+Na-2H              | HexCer 44:0;O <sub>2</sub>      | 0,90  | 0,000174 | Neutral glycosphingolipids | Simple Glc series                     | 803.6985; 801.6866                                                                                      |
| 900,7099  | 13,92 | C <sub>50</sub> H <sub>98</sub> NO <sub>7</sub> P               | M+FA-H               | PC O-42:2                       | 4,21  | 0,049704 | Glycerophospholipids       | Glycerophosphocholines                | 840.6901; 255.2327                                                                                      |
| 680,6215  | 13,94 | C <sub>41</sub> H <sub>81</sub> NO <sub>3</sub>                 | M+FA-H               | Cer 41:1;O <sub>2</sub>         | 2,63  | 0,057469 | Sphingolipids              | Ceramides                             | 634.6155                                                                                                |
| 708,6479  | 13,97 | C <sub>44</sub> H <sub>87</sub> NO <sub>5</sub>                 | M-H                  | Cer 18:1;O <sub>3</sub> /26:0;O | -4,52 | 0,004400 | Sphingolipids              | Ceramides                             | 660.6326; 408.3829; 281.2481                                                                            |
| 720,6521  | 14,12 | C <sub>44</sub> H <sub>85</sub> NO <sub>3</sub>                 | M+FA-H               | Cer 44:2;O <sub>2</sub>         | 1,47  | 0,083455 | Sphingolipids              | Ceramides                             | 674.6469                                                                                                |
| 595,4944  | 2,44  | C <sub>35</sub> H <sub>66</sub> O <sub>4</sub>                  | M+FA-H               | DG P-14/18:1                    | 0,18  | 0,001768 | Glycerolipids              | Diradylglycerols                      | 351.2513; 311.2220; 295.2271; 283.2634;<br>281.2479; 255.2322                                           |
| 717,5200  | 3,10  | C <sub>37</sub> H <sub>73</sub> N <sub>2</sub> O <sub>6</sub> P | M+FA-H               | SM 32:2;O <sub>2</sub>          | 1,78  | 0,049754 | Sphingolipids              | Phosphosphingolipids                  | 657.4981; 168.0424; 78.9584;                                                                            |
| 1598,0348 | 3,94  | C <sub>89</sub> H <sub>150</sub> O <sub>17</sub> P <sub>2</sub> | M+FA-H               | CL 80:12                        | 1,12  | 0,002967 | Glycerophospholipids       | Glycerophosphoglycerophosphoglycerols | 787.5240; 303.2323; 293.2636; 255.2325                                                                  |
| 552,4637  | 3,98  | C <sub>32</sub> H <sub>61</sub> NO <sub>3</sub>                 | M+FA-H               | Cer 14:1;O <sub>2</sub> /18:1   | 0,65  | 0,067776 | Sphingolipids              | Ceramides                             | 283.2636; 255.2325; 227.2015; 199.1702<br>662.4835; 483.2509; 465.2408; 415.2252;<br>330.2516; 329.2483 |
| 743,4690  | 3,98  | C <sub>43</sub> H <sub>69</sub> O <sub>8</sub> P                | M-H                  | PA 22:5/18:3                    | 4,43  | 0,002850 | Glycerophospholipids       | Glycerophosphates                     |                                                                                                         |
| 745,5509  | 4,06  | C <sub>39</sub> H <sub>77</sub> N <sub>2</sub> O <sub>6</sub> P | M+FA-H               | SM 34:2;O <sub>2</sub>          | 1,03  | 0,006539 | Sphingolipids              | Phosphosphingolipids                  | 745.5511; 685.5292; 168.0423; 78.9583                                                                   |
| 798,5305  | 4,10  | C <sub>42</sub> H <sub>76</sub> NO <sub>8</sub> P               | M+FA-H               | PC 20:4/14:4                    | 1,89  | 0,057414 | Glycerophospholipids       | Glycerophosphocholines                | 303.2321; 227.2014<br>463.2249; 391.2247; 327.2318; 283.2427;<br>227.2009; 203.1800                     |
| 716,4662  | 4,28  | C <sub>41</sub> H <sub>70</sub> NO <sub>8</sub> P               | M-H <sub>2</sub> O-H | PE 14:0/22:6                    | 0,18  | 0,051209 | Glycerophospholipids       | Glycerophosphoethanolamines           | 758.5355; 283.2641; 255.2321; 227.2009;<br>199.1701; 119.0345                                           |
| 786,5741  | 4,28  | C <sub>42</sub> H <sub>79</sub> NO <sub>9</sub>                 | M+FA-H               | HexCer 36:2;O <sub>3</sub>      | 0,53  | 0,002154 | Neutral glycosphingolipids | Simple Glc series                     |                                                                                                         |
| 557,4572  | 4,29  | C <sub>36</sub> H <sub>62</sub> O <sub>4</sub>                  | M-H                  | FAHFA 36:4                      | -0,58 | 0,057539 | Fatty Acyls                | Fatty acids and conjugates            | 295.2270; 279.2319                                                                                      |
| 581,4551  | 4,29  | C <sub>38</sub> H <sub>62</sub> O <sub>4</sub>                  | M-H                  | FAHFA 38:6                      | -4,19 | 0,004838 | Fatty Acyls                | Fatty acids and conjugates            | 301.2166; 279.2319                                                                                      |
| 800,5455  | 4,64  | C <sub>42</sub> H <sub>78</sub> NO <sub>8</sub> P               | M+FA-H               | PC 34:3                         | 1,11  | 0,002091 | Glycerophospholipids       | Glycerophosphocholines                | 740.5248                                                                                                |
| 554,4791  | 5,10  | C <sub>32</sub> H <sub>63</sub> NO <sub>3</sub>                 | M+FA-H               | Cer 32:1;O <sub>2</sub>         | 0,22  | 0,057239 | Sphingolipids              | Ceramides                             | 508.4743                                                                                                |
| 645,4515  | 5,10  | C <sub>35</sub> H <sub>67</sub> O <sub>8</sub> P                | M-H                  | PA 16:1/16:0                    | 2,15  | 0,058109 | Glycerophospholipids       | Glycerophosphates                     | 409.2353; 391.2244; 255.2321; 152.9952                                                                  |
| 747,5663  | 5,21  | C <sub>39</sub> H <sub>79</sub> N <sub>2</sub> O <sub>6</sub> P | M+FA-H               | SM 34:1;O <sub>2</sub>          | 0,69  | 0,002420 | Sphingolipids              | Phosphosphingolipids                  | 747.5660; 687.5450; 449.3141; 168.0423                                                                  |
| 580,4950  | 5,25  | C <sub>34</sub> H <sub>65</sub> NO <sub>3</sub>                 | M+FA-H               | Cer 18:2;O <sub>2</sub> /16:0   | 0,60  | 0,085827 | Sphingolipids              | Ceramides                             | 281.2477; 277.2010                                                                                      |

|           |      |                                                                 |                      |                               |       |          |                      |                                       |                                                            |
|-----------|------|-----------------------------------------------------------------|----------------------|-------------------------------|-------|----------|----------------------|---------------------------------------|------------------------------------------------------------|
| 1502,0671 | 5,35 | C <sub>41</sub> H <sub>77</sub> O <sub>8</sub> P                | 2M+FA-H              | PA 16:1/22:1                  | -1,61 | 0,002165 | Glycerophospholipids | Glycerophosphates                     | 671.4666; 391.2245; 281.2477; 255.2320; 253.2166           |
| 1676,1093 | 5,37 | C <sub>43</sub> H <sub>83</sub> O <sub>13</sub> P               | 2M-H                 | PI 16:0/18:0                  | 1,39  | 0,001990 | Glycerophospholipids | Glycerophosphoinositols               | 788.5249; 255.2320                                         |
| 732,5198  | 5,53 | C <sub>39</sub> H <sub>76</sub> NO <sub>9</sub> P               | M-H                  | PS P-16:0/17:0                | 1,83  | 0,051244 | Glycerophospholipids | Glycerophosphoserines                 | 437.2665; 419.2555                                         |
| 746,5139  | 5,93 | C <sub>43</sub> H <sub>74</sub> NO <sub>7</sub> P               | M-H                  | PE O-16:0/22:6                | 1,20  | 0,049707 | Glycerophospholipids | Glycerophosphoethanolamines           | 436.2824; 418.2707; 417.2406; 327.2319; 239.2384; 229.1960 |
| 419,2561  | 6,00 | C <sub>21</sub> H <sub>43</sub> O <sub>7</sub> P                | M-H <sub>2</sub> O-H | LPA 18:0/0:0                  | -1,50 | 0,070838 | Glycerophospholipids | Glycerophosphates                     | 283.2633; 171.0060; 152.9951; 134.9847; 96.9689; 78.9583   |
| 721,5032  | 6,00 | C <sub>37</sub> H <sub>73</sub> O <sub>8</sub> P                | M+FA-H               | PA 18:0/16:0                  | 0,99  | 0,051228 | Glycerophospholipids | Glycerophosphates                     | 437.2662; 283.2633; 96.9689;                               |
| 723,4986  | 6,00 | C <sub>41</sub> H <sub>73</sub> O <sub>8</sub> P                | M-H                  | PA 20:4/18:0                  | 2,20  | 0,003608 | Glycerophospholipids | Glycerophosphates                     | 457.2357; 439.2243; 419.2556; 283.2633; 96.9689; 78.9583   |
| 810,5305  | 6,00 | C <sub>43</sub> H <sub>76</sub> NO <sub>8</sub> P               | M+FA-H               | PE 24:4/18:1                  | 1,82  | 0,000175 | Glycerophospholipids | Glycerophosphoethanolamines           | 836.5458; 749.5134; 419.2556; 305.2468; 303.2319; 283.2633 |
| 781,5045  | 6,00 | C <sub>42</sub> H <sub>73</sub> O <sub>8</sub> P                | M+FA-H               | PA 20:4/19:1                  | 2,76  | 0,002378 | Glycerophospholipids | Glycerophosphates                     | 457.2357; 419.2556; 303.2319; 283.2633; 259.2427; 96.9689  |
| 1548,0302 | 6,06 | C <sub>42</sub> H <sub>74</sub> NO <sub>8</sub> P               | 2M+FA-H              | PE-NMe 36:5                   | 1,03  | 0,054096 | Glycerophospholipids | Glycerophosphoethanolamines           | 782.4990; 305.2473; 255.2321; 253.2172; 241.2168; 168.0425 |
| 714,5083  | 6,07 | C <sub>39</sub> H <sub>74</sub> NO <sub>8</sub> P               | M-H                  | PE 18:2/16:0                  | 0,52  | 0,006456 | Glycerophospholipids | Glycerophosphoethanolamines           | 458.2631; 452.2777; 279.2319; 255.2321; 253.2169; 140.0112 |
| 768,5560  | 6,07 | C <sub>43</sub> H <sub>80</sub> NO <sub>8</sub> P               | M-H                  | PE 38:3                       | 1,47  | 0,000229 | Glycerophospholipids | Glycerophosphoethanolamines           | 714.5082                                                   |
| 782,4995  | 6,09 | C <sub>41</sub> H <sub>72</sub> NO <sub>8</sub> P               | M+FA-H               | PE 18:2/18:3                  | 2,39  | 0,062799 | Glycerophospholipids | Glycerophosphoethanolamines           | 281.2473; 279.2319; 140.0112                               |
| 744,5209  | 6,11 | C <sub>39</sub> H <sub>74</sub> NO <sub>7</sub> P               | M+FA-H               | PE O-16:0/18:2                | 3,39  | 0,002437 | Glycerophospholipids | Glycerophosphoethanolamines           | 478.2930; 476.2778; 452.2780; 281.2474; 279.2319; 255.2321 |
| 1603,9960 | 6,46 | C <sub>95</sub> H <sub>148</sub> O <sub>17</sub> P <sub>2</sub> | M-H <sub>2</sub> O-H | CL 86:19                      | -3,29 | 0,002406 | Glycerophospholipids | Glycerophosphoglycerophosphoglycerols | 303.2320; 259.2426; 231.2116; 205.1957                     |
| 719,4891  | 6,73 | C <sub>38</sub> H <sub>73</sub> O <sub>10</sub> P               | M-H                  | PG 18:0/14:1                  | 3,09  | 0,051336 | Glycerophospholipids | Glycerophosphonylglycerol             | 283.2632                                                   |
| 775,5497  | 6,81 | C <sub>41</sub> H <sub>79</sub> O <sub>8</sub> P                | M+FA-H               | PA 20:0/18:1                  | 0,35  | 0,002500 | Glycerophospholipids | Glycerophosphates                     | 281.2481; 255.2323                                         |
| 582,5101  | 6,83 | C <sub>34</sub> H <sub>67</sub> NO <sub>3</sub>                 | M+FA-H               | Cer 18:1;O <sub>2</sub> /16:0 | -0,36 | 0,049759 | Sphingolipids        | Ceramides                             | 536.5042; 506.4942; 280.2641; 263.2388; 254.2492; 237.2218 |
| 748,5296  | 6,83 | C <sub>39</sub> H <sub>78</sub> NO <sub>7</sub> P               | M+FA-H               | PE O-34:1                     | -1,19 | 0,000105 | Glycerophospholipids | Glycerophosphoethanolamines           | 724.5269; 462.2983; 438.2980; 259.2426; 205.1960; 89.0236  |
| 816,5204  | 6,85 | C <sub>46</sub> H <sub>78</sub> NO <sub>10</sub> P              | M-H <sub>2</sub> O-H | PS 20:4/20:2                  | 2,34  | 0,000119 | Glycerophospholipids | Glycerophosphoserines                 | 303.2319; 259.2426; 205.1958                               |
| 608,5264  | 7,02 | C <sub>36</sub> H <sub>69</sub> NO <sub>3</sub>                 | M+FA-H               | Cer 18:2;O <sub>2</sub> /18:0 | 0,81  | 0,057405 | Sphingolipids        | Ceramides                             | 333.2702; 281.2476; 255.2321                               |
| 742,5404  | 7,02 | C <sub>41</sub> H <sub>78</sub> NO <sub>8</sub> P               | M-H                  | PE 18:2/18:0                  | 1,61  | 0,003962 | Glycerophospholipids | Glycerophosphoethanolamines           | 480.3089; 281.2476; 140.0112                               |
| 744,5555  | 7,09 | C <sub>41</sub> H <sub>80</sub> NO <sub>8</sub> P               | M-H                  | PE 18:1/18:0                  | 0,89  | 0,000102 | Glycerophospholipids | Glycerophosphoethanolamines           | 480.3088; 464.3140; 281.2477; 140.0112                     |
| 880,6087  | 7,19 | C <sub>48</sub> H <sub>86</sub> NO <sub>8</sub> P               | M+FA-H               | PE-NMe 20:4/22:1              | 1,69  | 0,055956 | Glycerophospholipids | Glycerophosphoethanolamines           | 820.5845; 794.5714; 303.2319; 259.2427                     |
| 913,5835  | 7,20 | C <sub>49</sub> H <sub>87</sub> O <sub>13</sub> P               | M-H                  | PI 22:4/18:0                  | 2,60  | 0,000127 | Glycerophospholipids | Glycerophosphoinositols               | 329.2477; 285.2593                                         |
| 887,5676  | 7,31 | C <sub>47</sub> H <sub>85</sub> NO <sub>13</sub> P              | M-H                  | PI 22:3/16:0                  | 2,36  | 0,057372 | Glycerophospholipids | Glycerophosphoinositols               | 860.5439; 751.5292; 594.2823; 331.2630                     |

|           |      |                                                                 |                      |                                |       |          |                      |                             |                                                                      |
|-----------|------|-----------------------------------------------------------------|----------------------|--------------------------------|-------|----------|----------------------|-----------------------------|----------------------------------------------------------------------|
| 837,5504  | 7,60 | C <sub>43</sub> H <sub>83</sub> O <sub>13</sub> P               | M-H                  | PI 16:0/18:0                   | 0,62  | 0,055699 | Glycerophospholipids | Glycerophosphoinositols     | 281.2476; 255.2321                                                   |
| 1524,0278 | 7,64 | C <sub>41</sub> H <sub>74</sub> NO <sub>8</sub> P               | 2M+FA-H              | PE 18:1/18:3                   | -0,53 | 0,001983 | Glycerophospholipids | Glycerophosphoethanolamines | 766.5401; 281.2477; 255.2321; 205.1960; 140.0113                     |
| 856,6083  | 8,06 | C <sub>46</sub> H <sub>86</sub> NO <sub>8</sub> P               | M+FA-H               | PC 18:3/20:0                   | 1,25  | 0,051531 | Glycerophospholipids | Glycerophosphocholines      | 796.5873; 742.5399; 279.2320                                         |
| 1327,8150 | 8,40 | C <sub>64</sub> H <sub>118</sub> N <sub>2</sub> O <sub>23</sub> | M+FA-H               | HexNAc-Cer 38:1;O <sub>2</sub> | 3,36  | 0,049698 | Sphingolipids        | Neutral glycosphingolipids  | 1281.8087; 840.6150; 780.5914                                        |
| 674,5149  | 8,59 | C <sub>37</sub> H <sub>74</sub> NO <sub>7</sub> P               | M-H                  | PE O-32:1                      | 2,86  | 0,061801 | Glycerophospholipids | Glycerophosphoethanolamines | 480.3094; 406.2804; 405.2761                                         |
| 700,5291  | 8,72 | C <sub>39</sub> H <sub>78</sub> NO <sub>8</sub> P               | M-H <sub>2</sub> O-H | PE 16:0/18:0                   | 0,54  | 0,003134 | Glycerophospholipids | Glycerophosphoethanolamines | 464.3136; 446.3031; 436.2827; 418.2721; 267.2686; 140.0113           |
| 776,5608  | 8,72 | C <sub>45</sub> H <sub>80</sub> NO <sub>7</sub> P               | M-H                  | PE O-22:5/18:0                 | 1,09  | 0,000108 | Glycerophospholipids | Glycerophosphoethanolamines | 464.3136; 446.3031; 403.2614; 329.2475; 285.2583; 267.2686; 140.0113 |
| 610,5418  | 9,21 | C <sub>36</sub> H <sub>71</sub> NO <sub>3</sub>                 | M+FA-H               | Cer 18:1/18:0;O <sub>2</sub>   | 0,33  | 0,004218 | Sphingolipids        | Ceramides                   | 564.5366; 308.2957; 255.2322                                         |
| 735,5369  | 9,37 | C <sub>43</sub> H <sub>77</sub> O <sub>7</sub> P                | M-H                  | PA P-18:1/22:4                 | 4,73  | 0,049694 | Glycerophospholipids | Glycerophosphates           | 331.2633; 78.9583                                                    |
| 636,5579  | 9,44 | C <sub>38</sub> H <sub>73</sub> NO <sub>3</sub>                 | M+FA-H               | Cer 18:2/20:0;O <sub>2</sub>   | 1,12  | 0,055918 | Sphingolipids        | Ceramides                   | 283.2630; 281.2477                                                   |
| 772,5873  | 9,46 | C <sub>43</sub> H <sub>84</sub> NO <sub>8</sub> P               | M-H                  | PE-NMe2 18:1/18:0              | 1,46  | 0,075295 | Glycerophospholipids | Glycerophosphoethanolamines | 508.3408; 283.2629; 281.2477; 168.0424                               |
| 832,6086  | 9,46 | C <sub>44</sub> H <sub>86</sub> NO <sub>8</sub> P               | M+FA-H               | PC 36:1                        | 1,69  | 0,064319 | Glycerophospholipids | Glycerophosphocholines      | 772.5871; 508.3405; 224.0688                                         |
| 900,5970  | 9,46 | C <sub>47</sub> H <sub>86</sub> NO <sub>10</sub> P              | M+FA-H               | PS 22:2/19:1                   | -0,15 | 0,063071 | Glycerophospholipids | Glycerophosphoserines       | 283.2629; 281.2477                                                   |
| 662,5738  | 9,47 | C <sub>40</sub> H <sub>75</sub> NO <sub>3</sub>                 | M+FA-H               | Cer 40:3;O <sub>2</sub>        | 1,42  | 0,067942 | Sphingolipids        | Ceramides                   | 616.5674                                                             |
| 688,5894  | 9,61 | C <sub>42</sub> H <sub>77</sub> NO <sub>3</sub>                 | M+FA-H               | Cer 42:4;O <sub>2</sub>        | 1,36  | 0,070795 | Sphingolipids        | Ceramides                   | 642.5839; 388.3582                                                   |
| 829,6455  | 9,61 | C <sub>45</sub> H <sub>89</sub> N <sub>2</sub> O <sub>6</sub> P | M+FA-H               | SM 40:2;O <sub>2</sub>         | 1,82  | 0,003057 | Sphingolipids        | Phosphosphingolipids        | 769.6235                                                             |
| 844,5494  | 9,67 | C <sub>46</sub> H <sub>82</sub> NO <sub>9</sub> P               | M+Na-2H              | PS O-40:5                      | 2,47  | 0,002785 | Glycerophospholipids | Glycerophosphoserines       | 776.5612; 231.2118                                                   |
